# Supplementary material
Source: PubMed Central journal article supplement (PMC7190927)
Supplement: jci-130-128687-s389.pdf [file jci-130-128687-s389.pdf]

## Supplemental Figures

### Figure S1

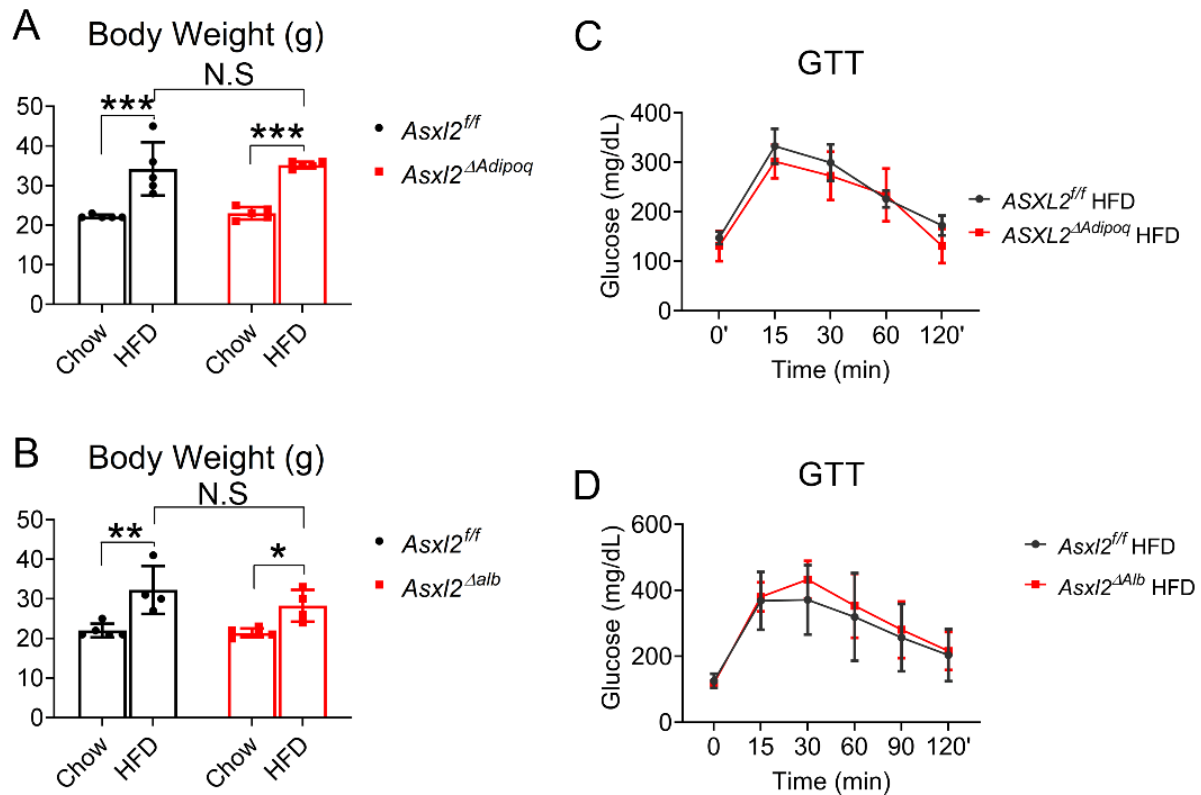

**Fig S1:** *Asx12* deletion in adipose tissue or liver does not impact HFD-induced weight gain and glucose tolerance. A, B) Body weights of mice with selective deletion of *Asx12* in A) adipose tissue or B) liver, fed chow diet or HFD for 8 weeks. C, D) Glucose tolerance test of mice with selective deletion of *Asx12* in C) adipose tissue or D) liver, fed HFD for 8 weeks. Data are presented as mean ± SD. \*\*p < 0.01; \*\*\* p < 0.001 as determined by 2 way ANOVA with Holm-Sidak's post hoc analysis for multiple comparisons test.

**Figure S2**

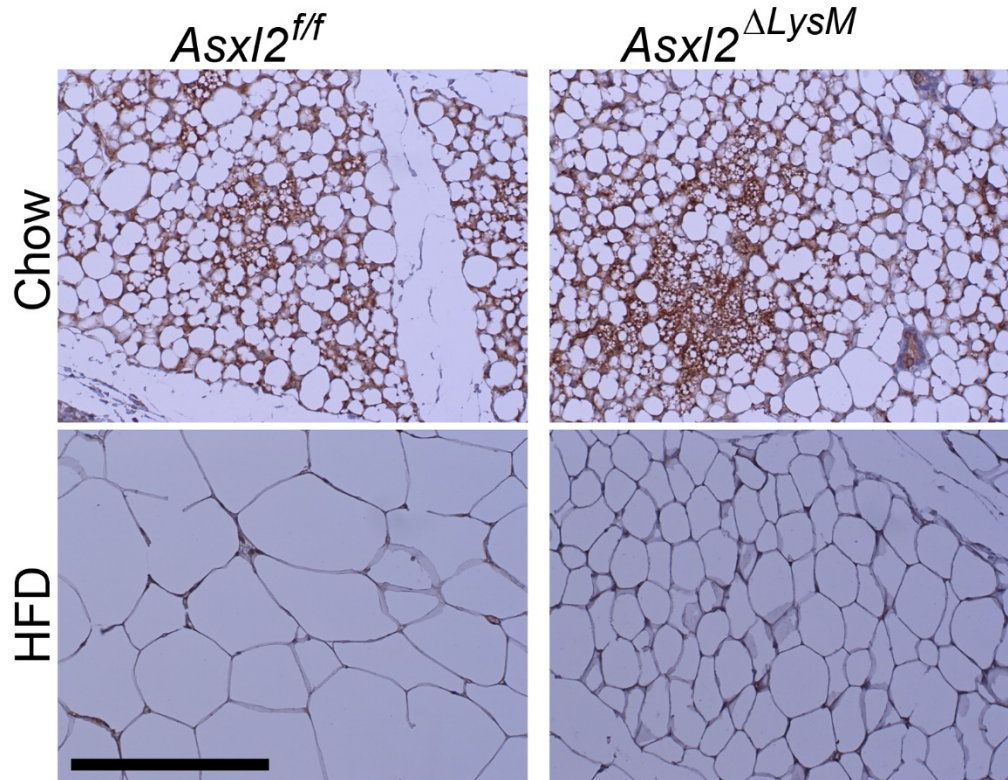

**Fig S2:** Beiging is not evident in WAT of *Asx12<sup>ΔLysM</sup>* mice fed HFD. Histological sections of inguinal WAT of *Asx12<sup>f/f</sup>* and *Asx12<sup>ΔLysM</sup>* mice fed chow diet or HFD immunostained for UCP1; Scale bar: 200μm.

Figure S3

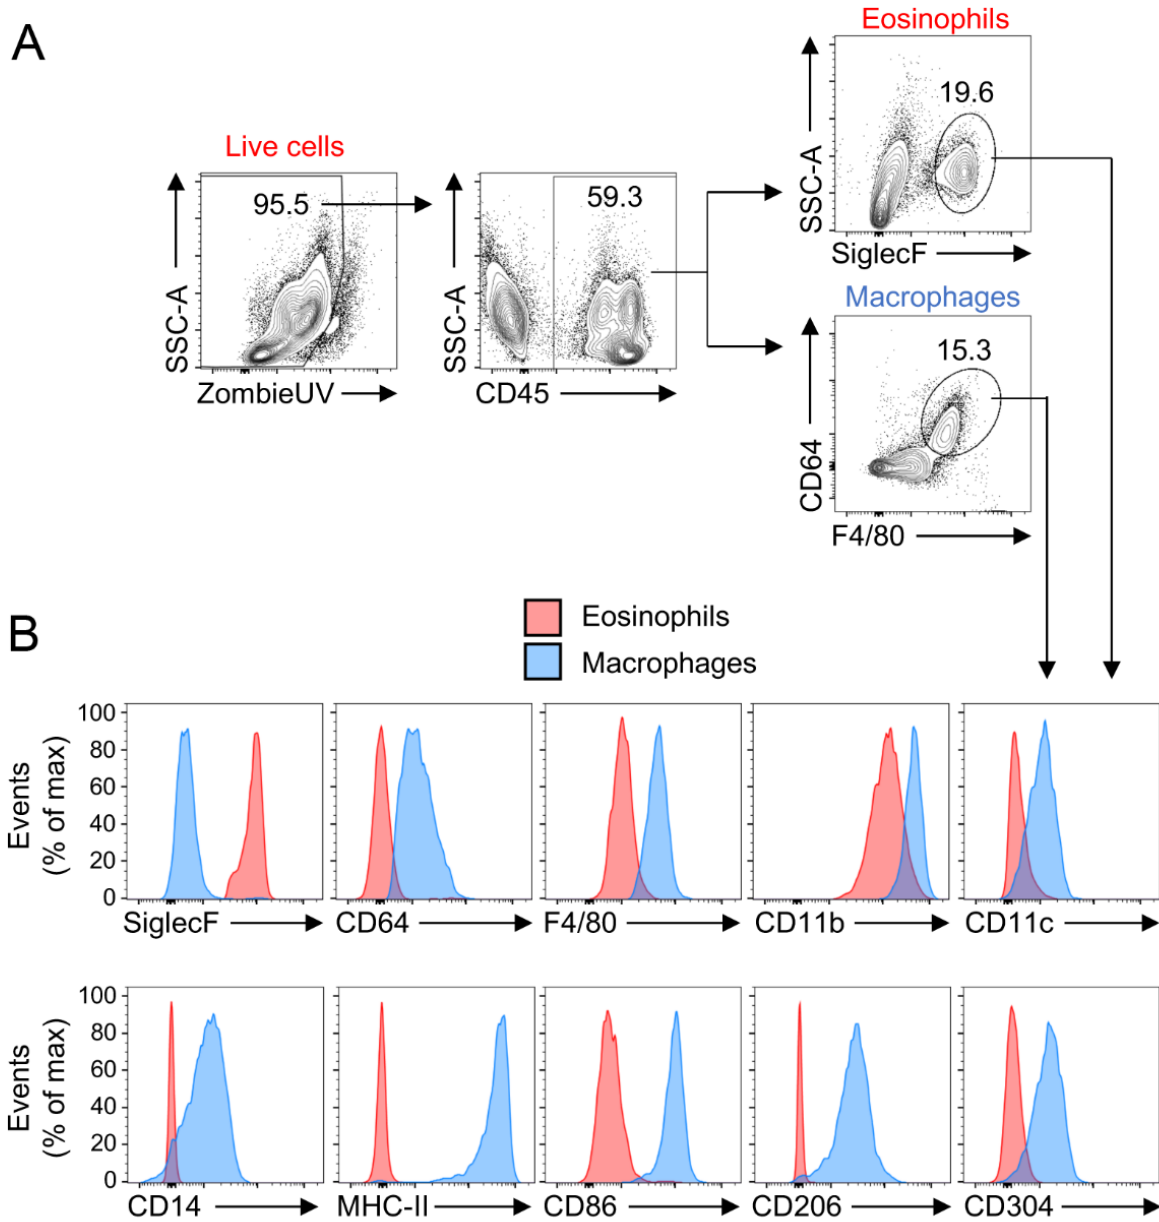

**Fig S3:** Identification of macrophages and eosinophils in adipose tissue. The stromal vascular fraction of gonadal adipose tissue of HFD- fed *Asx12<sup>ff</sup>* and *Asx12<sup>ALysM</sup>* mice was isolated and stained for flow cytometric analysis. A) Gating strategy to define SSC<sup>hi</sup> SiglecF<sup>+</sup> eosinophils (red) and F4/80<sup>+</sup> CD64<sup>+</sup> macrophages (blue). B) These eosinophil and macrophage populations were gated and overlaid to examine expression of the indicated surface markers.

Figure S4

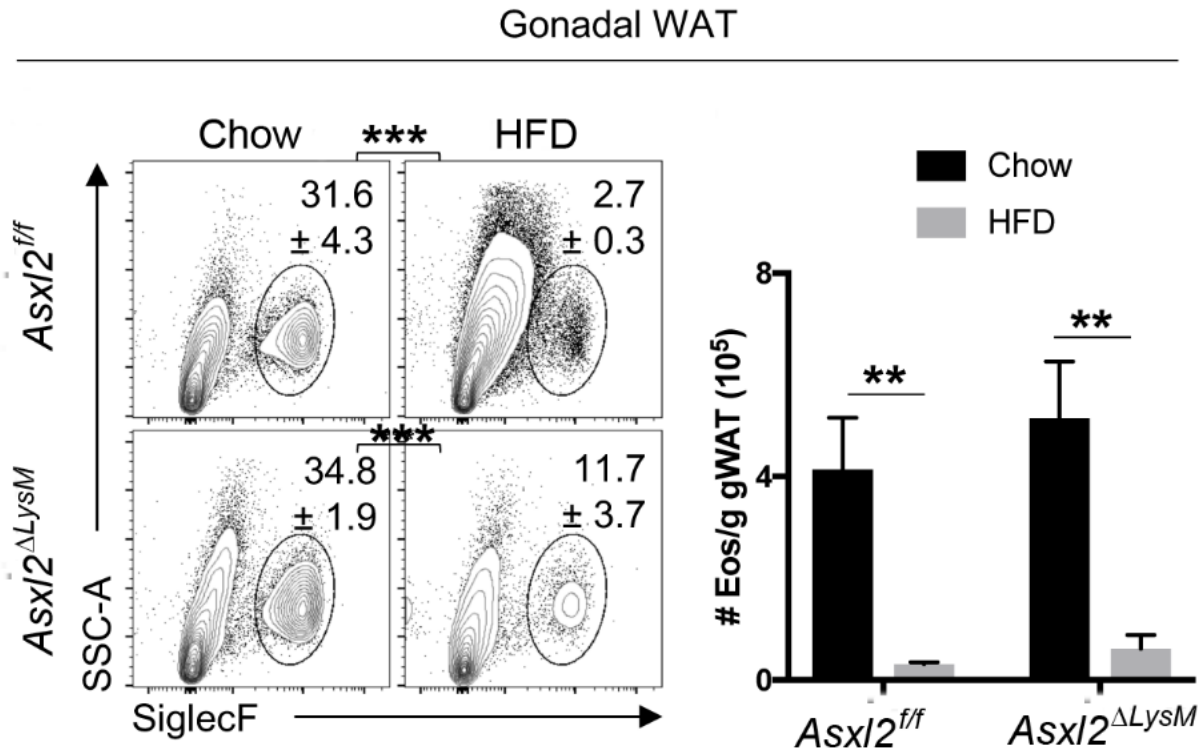

**Fig S4:** Eosinophils are decreased in obese gonadal WAT in an ASXL2-independent manner. Female *Asxl2<sup>ff</sup>* and *Asxl2<sup>ΔLysM</sup>* mice were fed either a chow diet or HFD for 8 weeks. A) Frequencies and B) numbers of SSC<sup>hi</sup> SiglecF<sup>+</sup> eosinophils in gonadal white adipose tissue (WAT). Pre-gated on singlet, live, CD45<sup>+</sup> cells. Two-way analysis of variance with Tukey post-hoc test.

Figure S5

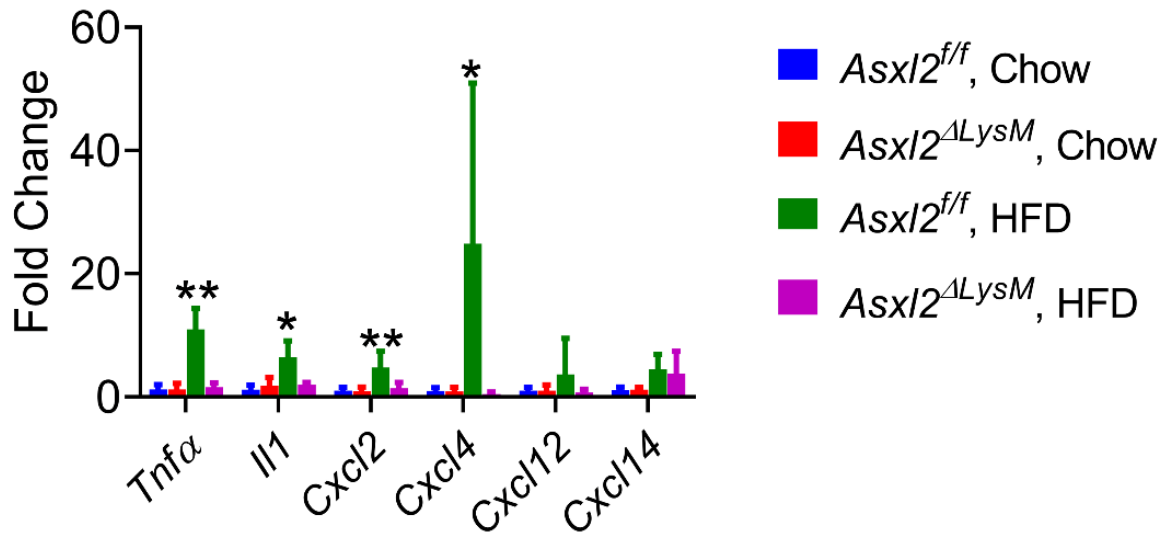

**Fig S5:** *Asxl2* expression in myeloid cells is required for macrophage accumulation in WAT and BAT in obesity. Inflammatory cytokine and chemokine mRNA expression in stromal vascular fraction of gonadal WAT of *Asxl2<sup>f/f</sup>* or *Asxl2<sup>ΔLysM</sup>* mice after 8 weeks fed with Chow diet or HFD. Data are presented as mean  $\pm$  SD. \* $p < 0.05$ ; \*\* $p < 0.01$ ; \*\*\*  $p < 0.001$  as determined 2 way ANOVA with Holm-Sidak's post hoc analysis for multiple comparisons test.

**Figure S6**

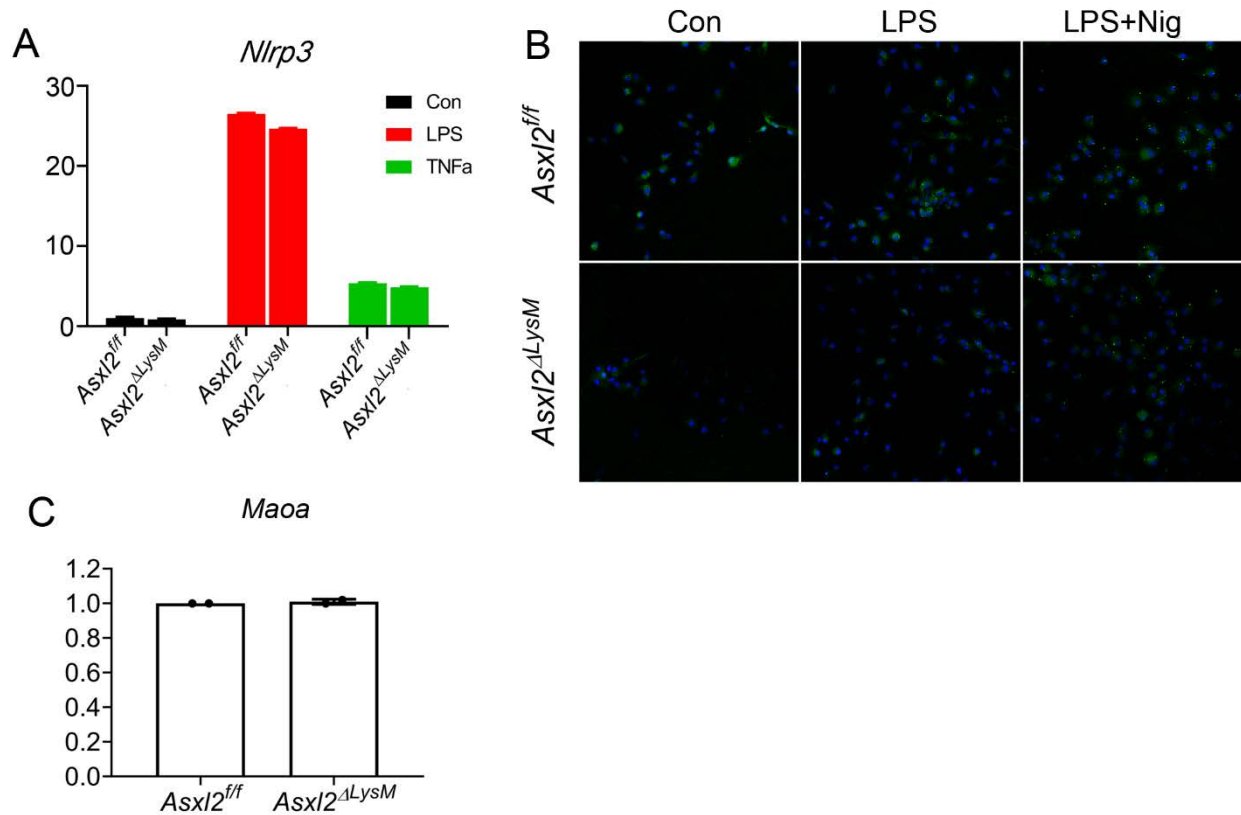

**Fig S6:** ASXL2 does not affect NLRP3 activation in macrophages. A) BMMs of *Asxl2<sup>ff</sup>* and *Asxl2 $\Delta$ LysM* mice were stimulated with LPS (100ng/ml) or TNF $\alpha$  (10 ng/ml) for 3 hours, *Nlrp3* mRNA expression were measured by qPCR; B) *Asxl2<sup>ff</sup>* or *Asxl2 $\Delta$ LysM* BMMc were incubated for 3 hours with 100 ng/ml LPS and stimulated with 15  $\mu$ M nigericin for 30 minutes. Cells were then incubated with FLICA<sup>TM</sup> FAM-YVAD-FMK probe and analyzed by fluorescence microscopy. C) *Maa* mRNA abundance in BMMs of *Asxl2<sup>ff</sup>* and *Asxl2 $\Delta$ LysM* mice were analyzed by qPCR. (n= 2 independent experiments).

**Figure S7**

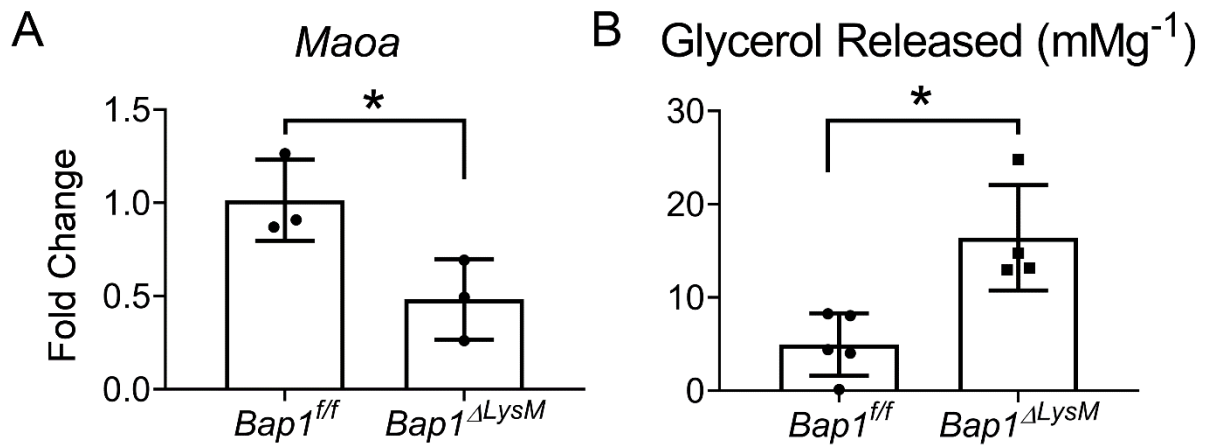

**Fig S7:** A) *Maoa* mRNA abundance in BAT stromal vascular fraction of HFD-fed control and *Bap1<sup>ΔLysM</sup>* mice; B) Lipolysis analysis in BAT explants derived from HFD-fed control and *Bap1<sup>ΔLysM</sup>* mice. Data are presented as mean  $\pm$  SD. \* $p < 0.05$  as determined by unpaired t test.

**Figure S8**

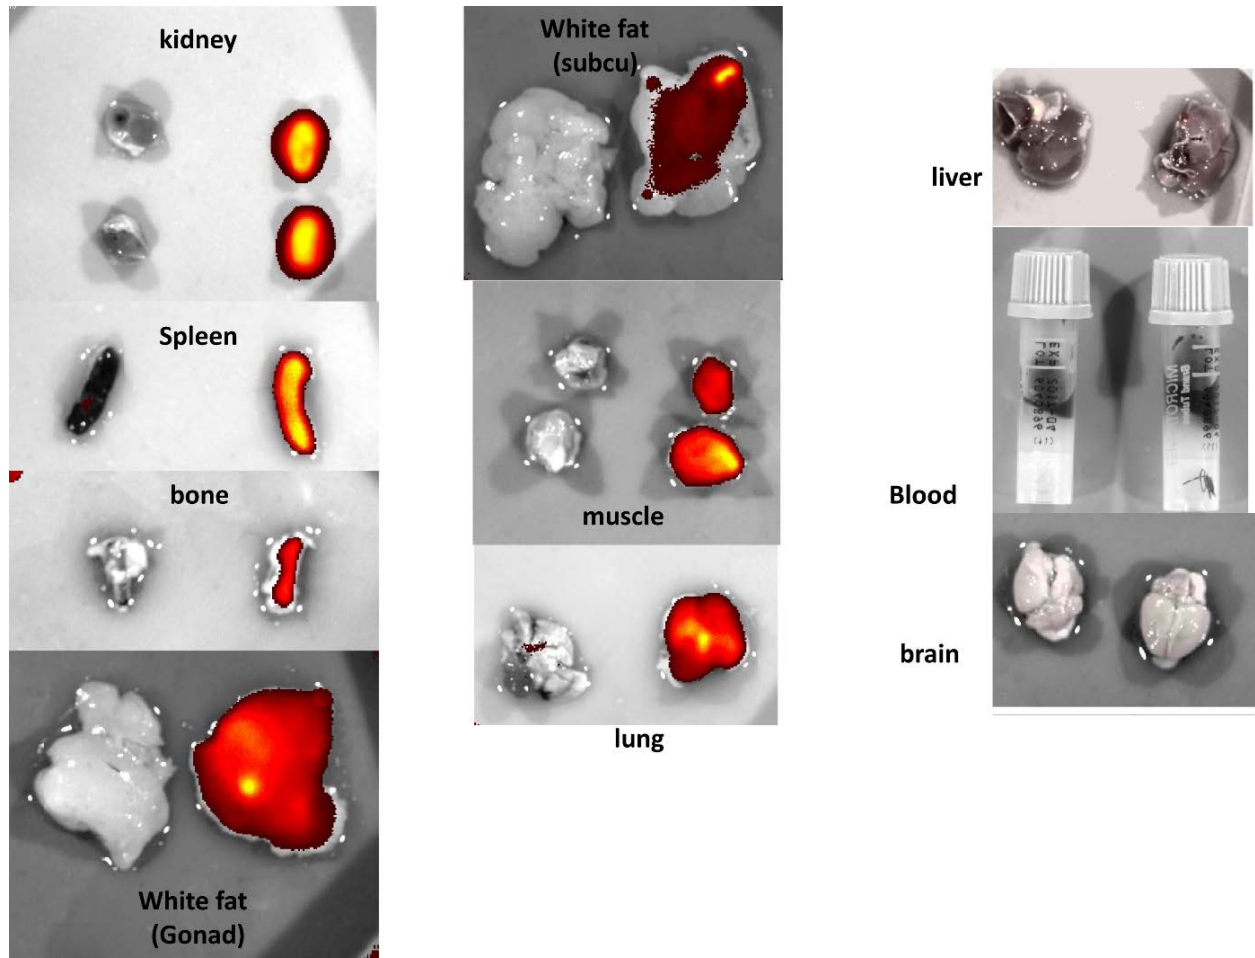

**Fig S8:** Nanoparticle-associated *Asx12*-siRNA targets macrophages in numerous tissues. Fluorescent scan of organs of WT HFD-fed WT mice administered Cy5.5-labeled nanoparticle free (left) or nanoparticle-associated (right) *Asx12*-siRNA
